# Supplementary material for: Long-term monitoring of intravital biological processes using fluorescent protein-assisted NIR-II imaging
Source: PubMed Central journal article supplement (PMC9636246; doi:10.1038/s41467-022-34274-w), 2022-11-04
Supplement: 41467_2022_34274_MOESM1_ESM.pdf [file 41467_2022_34274_MOESM1_ESM.pdf]

**Supplementary Information:**

**Long-term monitoring of intravital biological processes using  
fluorescent protein-assisted NIR-II imaging**

**Chen et al**

## **Long-term monitoring of intravital biological processes using fluorescent protein-assisted NIR-II imaging**

**Supplementary Figure 1.** iRFPs purification.

**Supplementary Figure 2.** NIR-II fluorescence imaging of stable iRFP713-expressing cells.

**Supplementary Figure 3.** NIR-II fluorescence imaging of mice infected with iRFP713-encoding adenovirus.

**Supplementary Figure 4.** Construction of iRFP713 transgenic reporter mice.

**Supplementary Figure 5.** The expression pattern of iRFP713 in different tissues of iRFP713 general expression mice.

**Supplementary Figure 6.** Specific expression of iRFP713 in the liver of hepatocyte-specific iRFP713 expressing mice.

**Supplementary Figure 7.** Liver morphology of the hepatocyte-specific iRFP713 expression mice after PHX.

**Supplementary Figure 8.** Effect of iRFP713 expression on hepatocyte proliferation after PHX.

**Supplementary Figure 9.** Hepatotoxicity and NIR-II fluorescence *in vivo* imaging of ICG.

**Supplementary Figure 10.** Comparison of liver proliferation and injury between iRFP713 and ICG.

**Supplementary Figure 11.** Characterization of APAP toxicity model.

**Supplementary Figure 12.** Liver injury and recovery of hepatocyte-specific iRFP713 expressing mice treated with APAP.

**Supplementary Figure 13.** Characterization of multiple low-dose STZ induced diabetes.

**Supplementary Figure 14.** Long-term expression stability of iRFP713 transgenic mice.

**Supplementary Figure 15.** Comparison of iRFP713 imaging in NIR-I and NIR-II regions.

**Supplementary Table 1.** The calculated area SBR values.

**Supplementary Table 2.** Primers of iRFP713.

**Supplementary Table 3.** Antibodies used for experiments.

## Supplementary Figure 1. iRFPs purification.

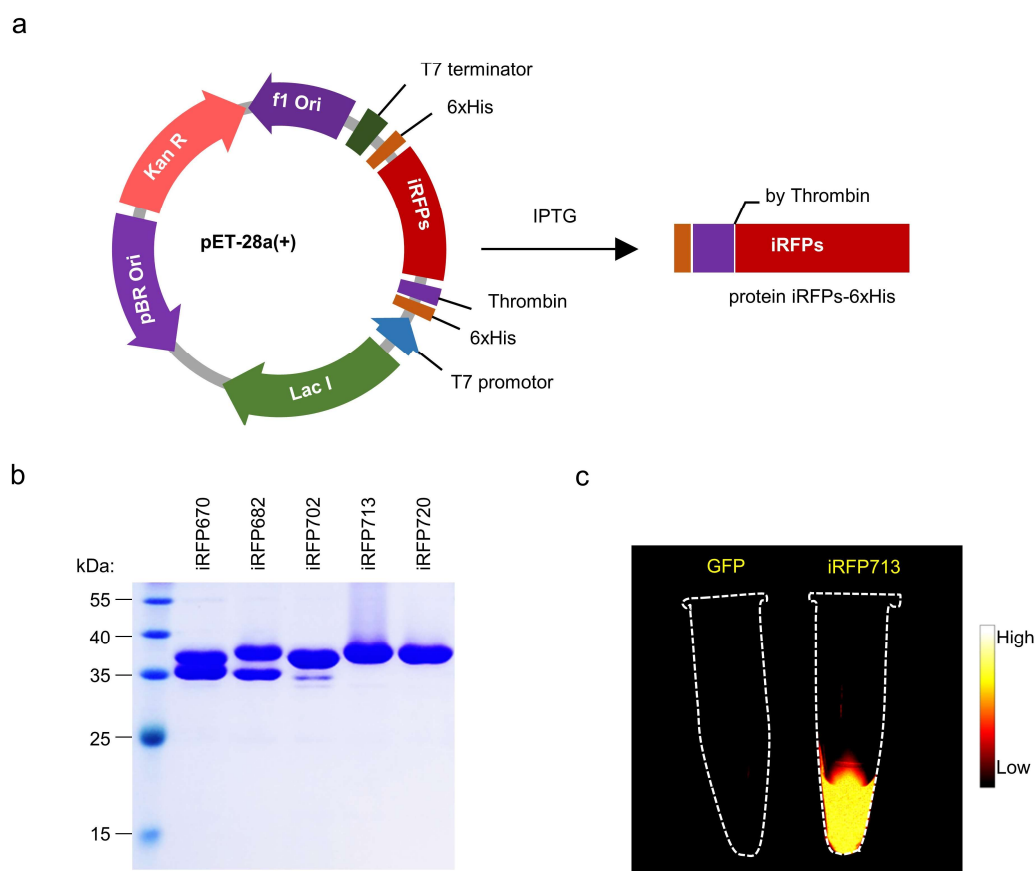

**(a)** Diagram of the recombinant pET28a-iRFPs-6xHis plasmid, for expression of N-terminally 6xHis-tagged proteins with a thrombin site. **(b)** Coomassie blue staining of purified recombinant iRFPs. Experiment was performed in biological triplicate. **(c)** A NIR-II fluorescence image of purified recombinant GFP protein and iRFP713 protein with 690 nm excitation and 900 nm LP filters. Exposure times: 10 ms. Source data are provided as a Source Data file.

**Supplementary Figure 2.** NIR-II fluorescence imaging of stable iRFP713-expressing cells.

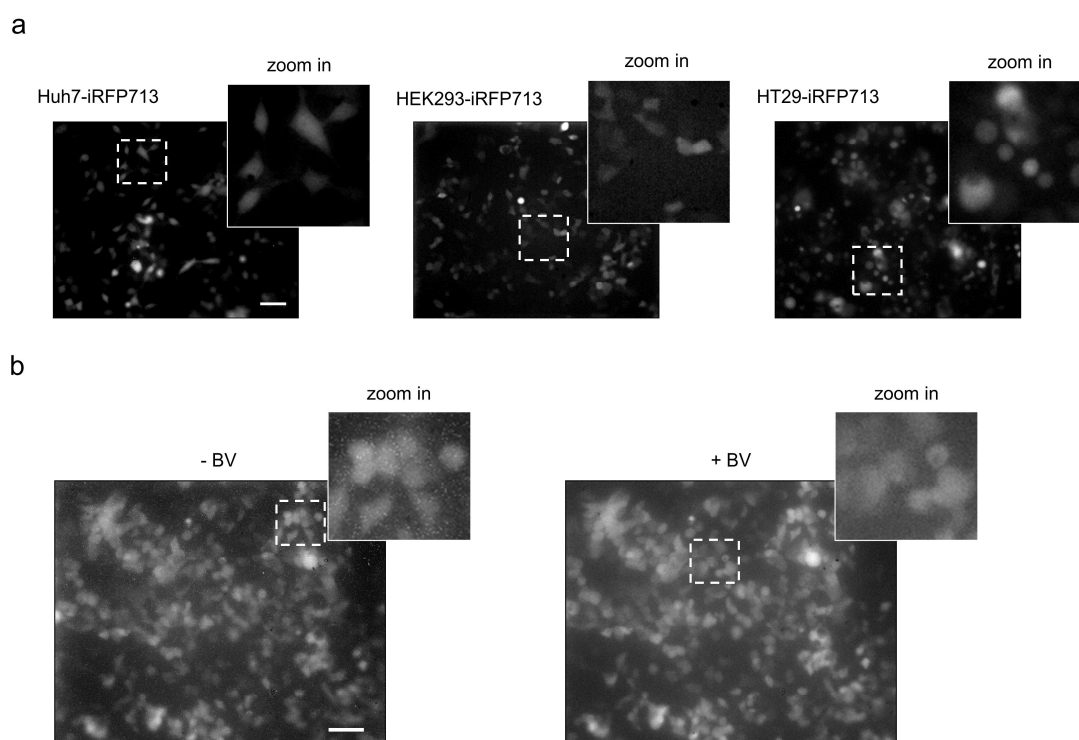

**(a)** NIR-II fluorescence wide-field microscopic images of various iRFP713 stably transfected cells, including Huh7-iRFP713, HEK293-iRFP713, and HT29-iRFP713. **(b)** NIR-II fluorescence images of HEK293-iRFP713 cells without and with addition of 25  $\mu$ M BV for 2 hours. Each cell experiment was performed three times independently in duplicate each time. Cells were imaged under 690 nm excitation, using 900 nm LP filters. Scale bar: 50  $\mu$ m.



**Supplementary Figure 3.** NIR-II fluorescence imaging of mice infected with iRFP713-encoding adenovirus.

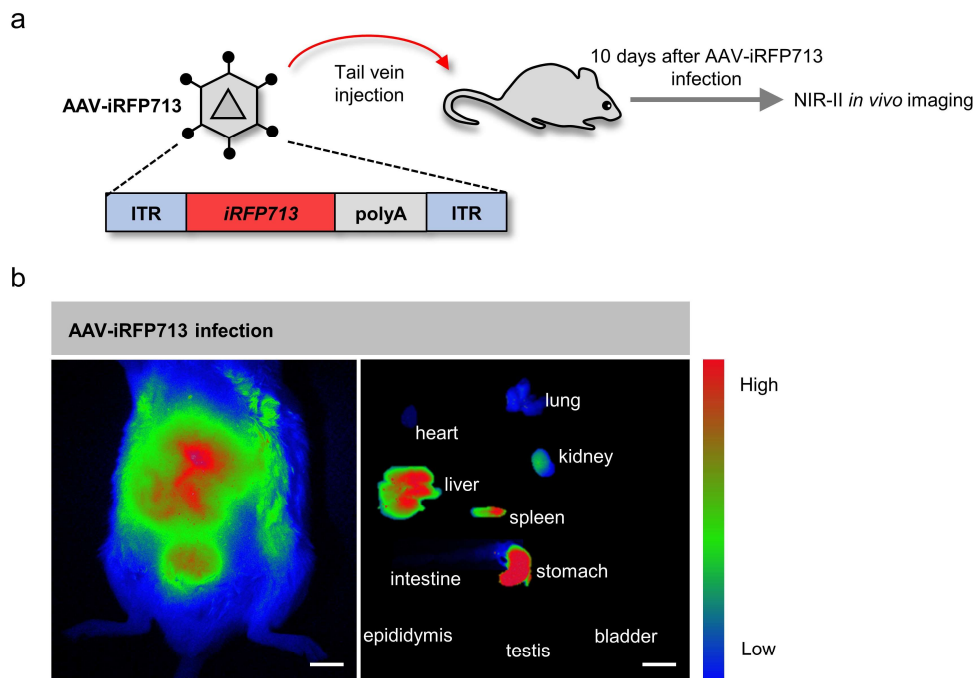

**(a)** Diagram representing the iRFP713-encoding adenovirus (AAV-iRFP713) and the experimental design used in the corresponding animal studies. C57BL/6 mice (male 6-8 weeks old) were intravenously injected with  $2 \times 10^9$  infectious units of the iRFP713-encoding adenovirus. **(b)** Ten days after injection, iRFP713-infected mice and their isolated organs were imaged using a 690 nm laser and 900 nm LP filter for excitation and emission, respectively. Exposure times: 50 ms. Scale bars: 2 mm (**b, left**) and 1 cm (**b, right**).

**Supplementary Figure 4. Construction of iRFP713 transgenic reporter mice.**

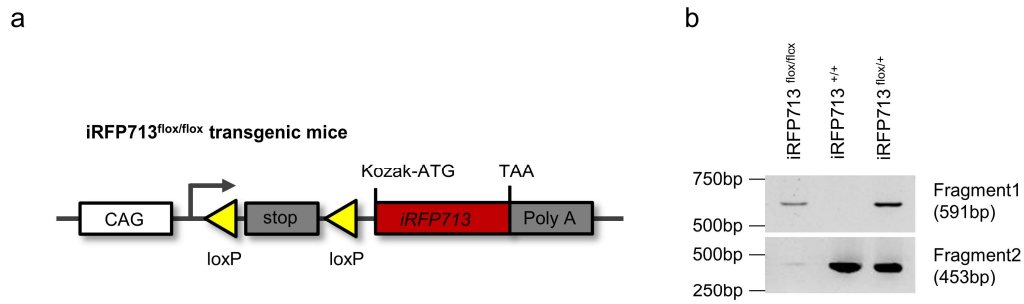

**(a)** Genome structure of the pCAG-loxP-stop-loxP-iRFP713 transgene in iRFP713<sup>flox/flox</sup> transgenic mice. The transgene consists of a CAG promoter, a loxP-flanked stop gene, followed by iRFP713. Cre-mediated recombination excises the floxed stop gene, resulting in the expression of iRFP713. **(b)** Genotyping PCR of iRFP713 transgenic mice, and independent triplicate experiments were repeated. Source data are provided as a Source Data file.

**Supplementary Figure 5.** The expression pattern of iRFP713 in different tissues of iRFP713 general expressing mice.

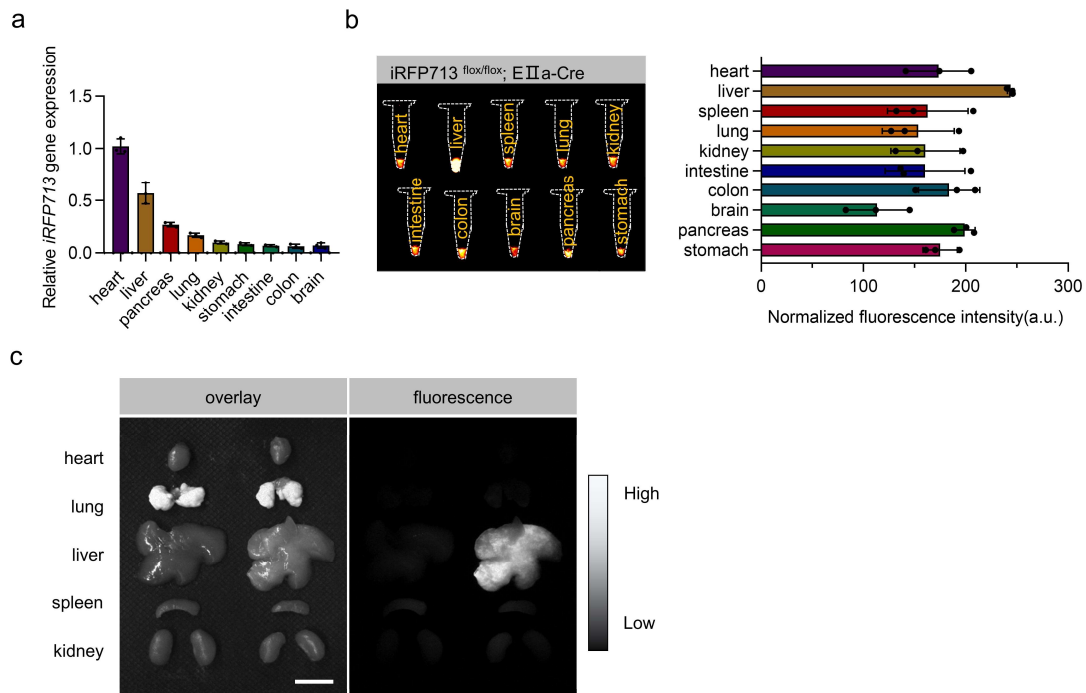

**(a)** *iRFP713* gene expression levels in different tissues of *iRFP713<sup>flx/flx</sup>; EIIa-Cre* mice (n = 3 mice). **(b)** Representative NIR-II fluorescence images of different protein extracts from the various tissues of *iRFP713<sup>flx/flx</sup>; EIIa-Cre* mice. Mean fluorescence intensities were normalized to per mg protein of each tissue and are shown on the right (n = 3 mice). **(c)** Representative overlay (NIR-II fluorescence + brightfield channel) and NIR-II fluorescence images of major organs isolated from littermate controls (left) and *iRFP713<sup>flx/flx</sup>; EIIa-Cre* mice (right). All data presented as mean values  $\pm$  SEM. Images were acquired using 690 nm excitation and 900 nm LP filters. Exposure times: 30 ms **(b, c)**. Scale bar: 1 cm.

**Supplementary Figure 6.** Specific expression of iRFP713 in the liver of hepatocyte-specific iRFP713 expressing mice.

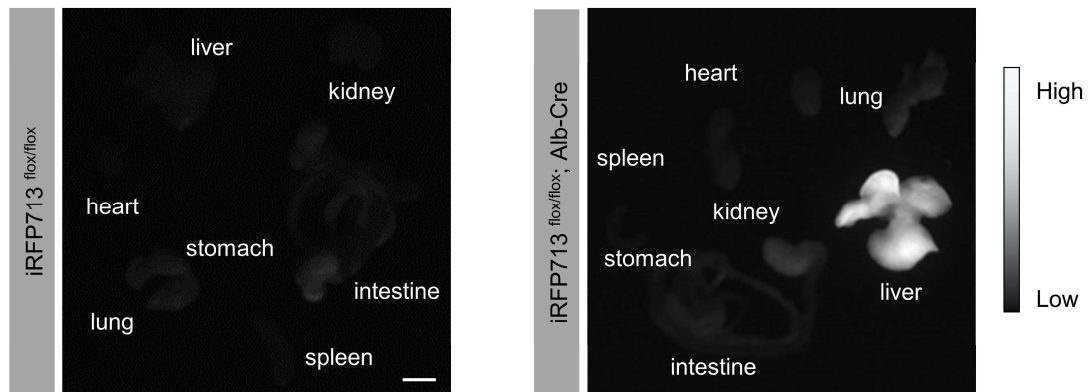

Representative NIR-II fluorescence images of major organs isolated from littermate controls ( $iRFP713^{flox/flox}$ ) and hepatocyte-specific iRFP713 expressing mice ( $iRFP713^{flox/flox}; Alb-Cre$ ). Isolated organs were imaged using 690 nm excitation and 900 nm LP filters. Exposure times: 15 ms. Scale bar: 1 cm.

**Supplementary Figure 7.** Liver morphology of the hepatocyte-specific iRFP713 expressing mice after partial hepatectomy (PHX).

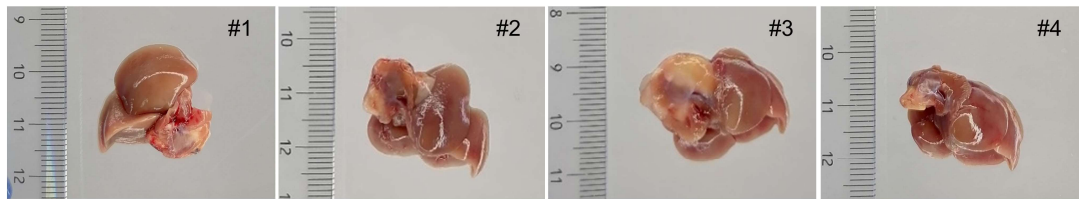

Liver resection model was established by removing the middle lobe and left lobe of iRFP713<sup>flox/flox</sup>; Alb-Cre mice. Ten days after PHX, mice were sacrificed, livers were isolated, and gross liver morphology of each mouse was imaged. The numbers in the upper-right corner of each panel represents individual mice.

**Supplementary Figure 8. Effect of iRFP713 expression on hepatocyte proliferation after PHX.**

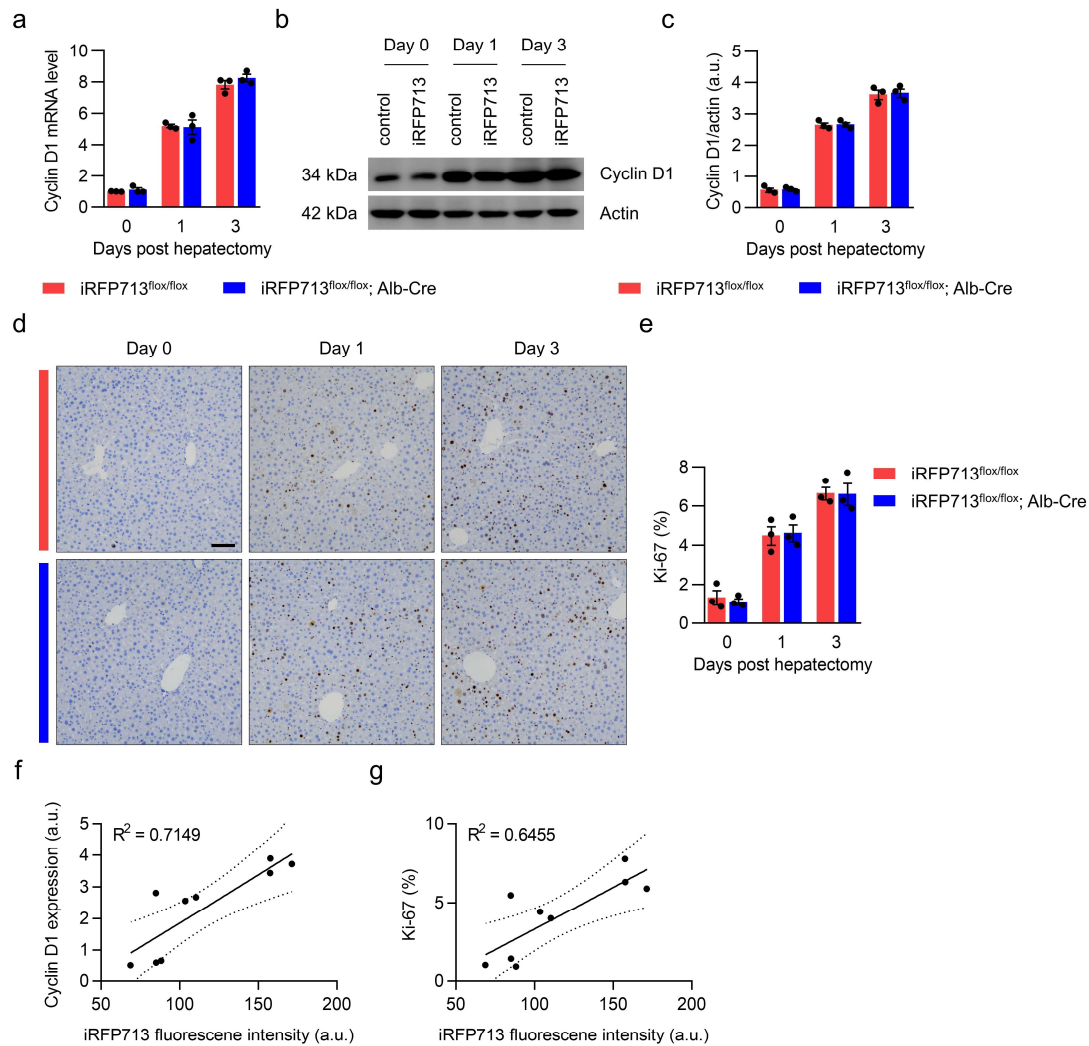

Liver was harvested from iRFP713<sup>flox/flox</sup> and iRFP713<sup>flox/flox</sup>; Alb-Cre mice at day 0, day 1 and day 3 after PHX. **(a)** mRNA level **(b)** and protein level of cyclin D1, **(c)** intensities of cyclin D1 protein bands were quantified and normalized to actin (n = 3 mice). **(d)** Representative images and **(e)** quantification of IHC staining for Ki-67 (n = 3 mice). The correlations between iRFP713 fluorescence intensity and cyclin D1 protein expression **(f)**, and Ki-67 staining **(g)**, error bands display 95% confidence intervals. All data presented as mean values ± SEM. Scale bars: 20 μm **(d)**. Source data are provided as a Source Data file.

**Supplementary Figure 9.** Hepatotoxicity and NIR-II fluorescence *in vivo* imaging of ICG.

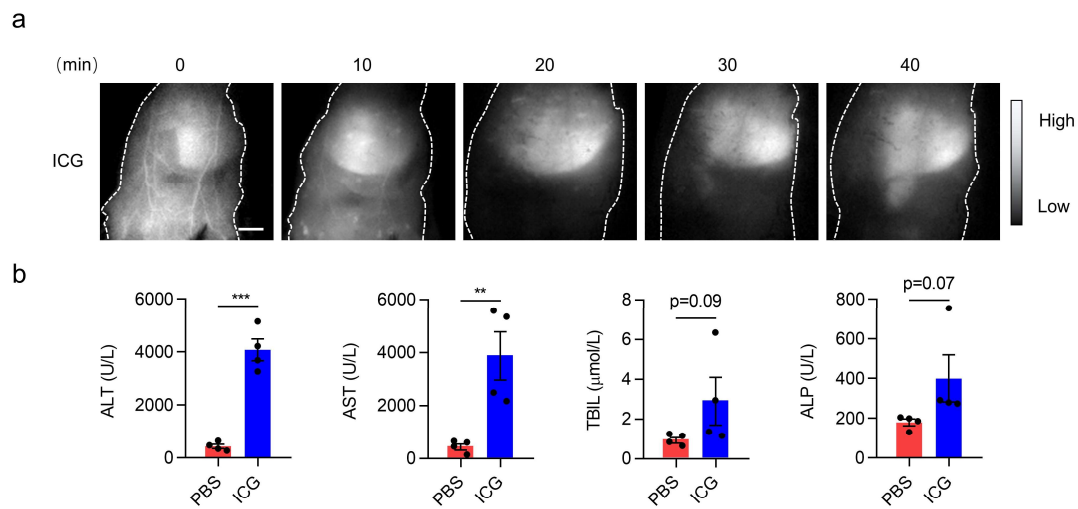

**(a)** Representative fluorescence images of C57BL/6 mice at different time points after intravenous injection of ICG (1 mg/mL). Images were recorded with 793 nm excitation and 900 nm LP collection. **(b)** Four main hepatic function indexes of ICG-treated mice. 6 to 8-week-old C57BL/6 mice underwent liver resection and were subsequently treated with ICG (1 mg/mL) or control PBS. After 24 hours, sera were collected from the mice for liver functional tests, including alanine transaminase (ALT, \*\*\* $p<0.001$ ), aspartate transaminase (AST, \*\* $p<0.01$ ), total bilirubin (TBIL), and alkaline phosphatase (ALP). Data presented as mean  $\pm$  SEM;  $n = 4$  mice for each group. Statistical analysis were performed by unpaired two-tailed Student's  $t$  test. Exposure times: 15 ms. Scale bar: 5 mm.

**Supplementary Figure 10.** Comparison of liver proliferation and injury between iRFP713 and ICG.

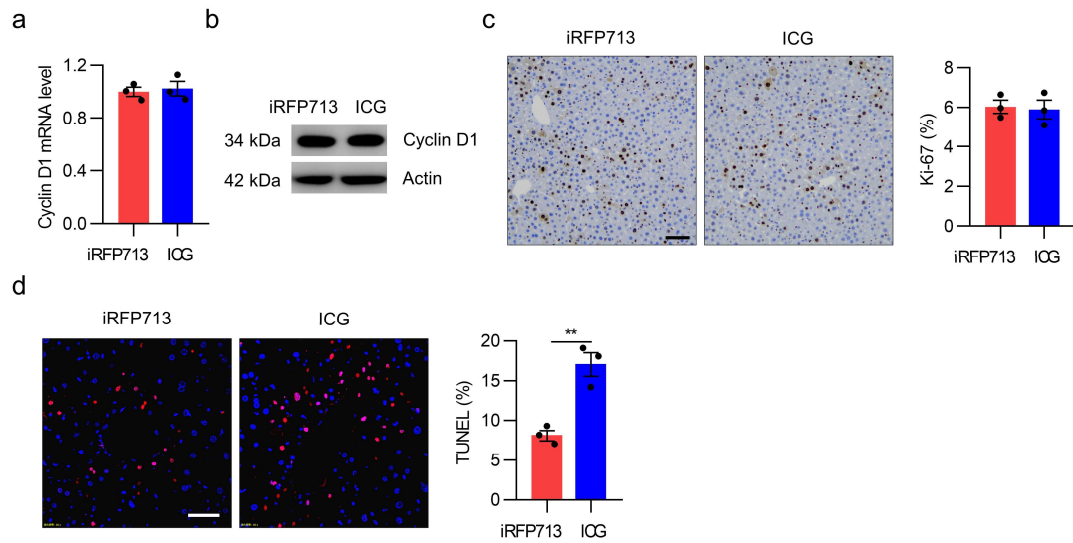

One day after PHX, iRFP713<sup>fl<sub>ox</sub>/fl<sub>ox</sub></sup>; Alb-Cre mice and ICG treated C57BL/6 mice were sacrificed, and liver tissues were isolated from the mice for proliferation and injury detection. **(a)** mRNA level and **(b)** protein level of cyclin D1. **(c)** Representative IHC images and quantification of Ki-67 staining on liver sections. **(d)** Representative merged fluorescence images (TUNEL, red and DAPI, blue) and quantification of TUNEL assay (\*\*p<0.01). All data presented as mean ± SEM; n = 3 mice for each group. Statistical analysis were performed by unpaired two-tailed Student's t test. Scale bars: 10 μm **(c)** and 5 μm **(d)**. Source data are provided as a Source Data file.



**Supplementary Figure 11.** Characterization of APAP toxicity model.

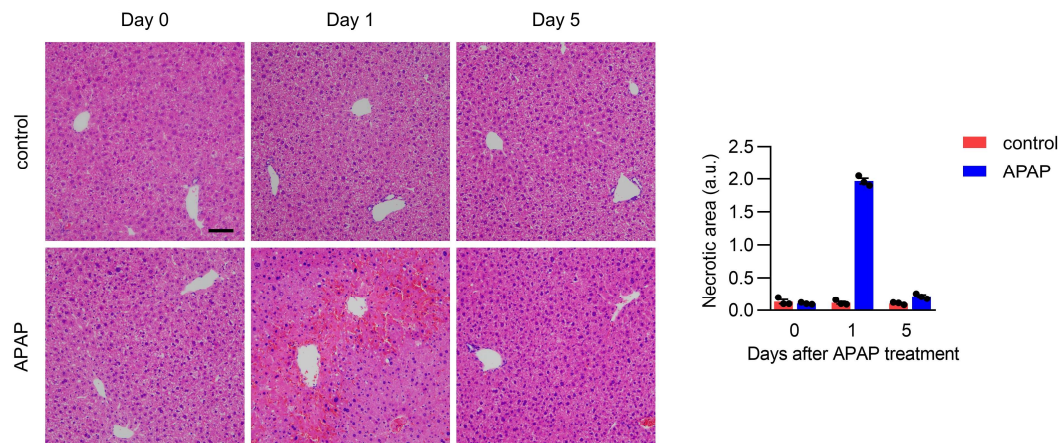

HE staining of liver isolated from  $iRFP713^{lox/lox}$ ; Alb-Cre mice treated with or without APAP (250 mg/kg) at day 0, day 1 and day 5. Quantification of necrotic area was provided in the right. Data presented as mean  $\pm$  SEM;  $n = 3$  mice for each group. Scale bar: 20  $\mu$ m.

**Supplementary Figure 12.** Liver injury and recovery of hepatocyte-specific iRFP713 expressing mice treated with APAP.

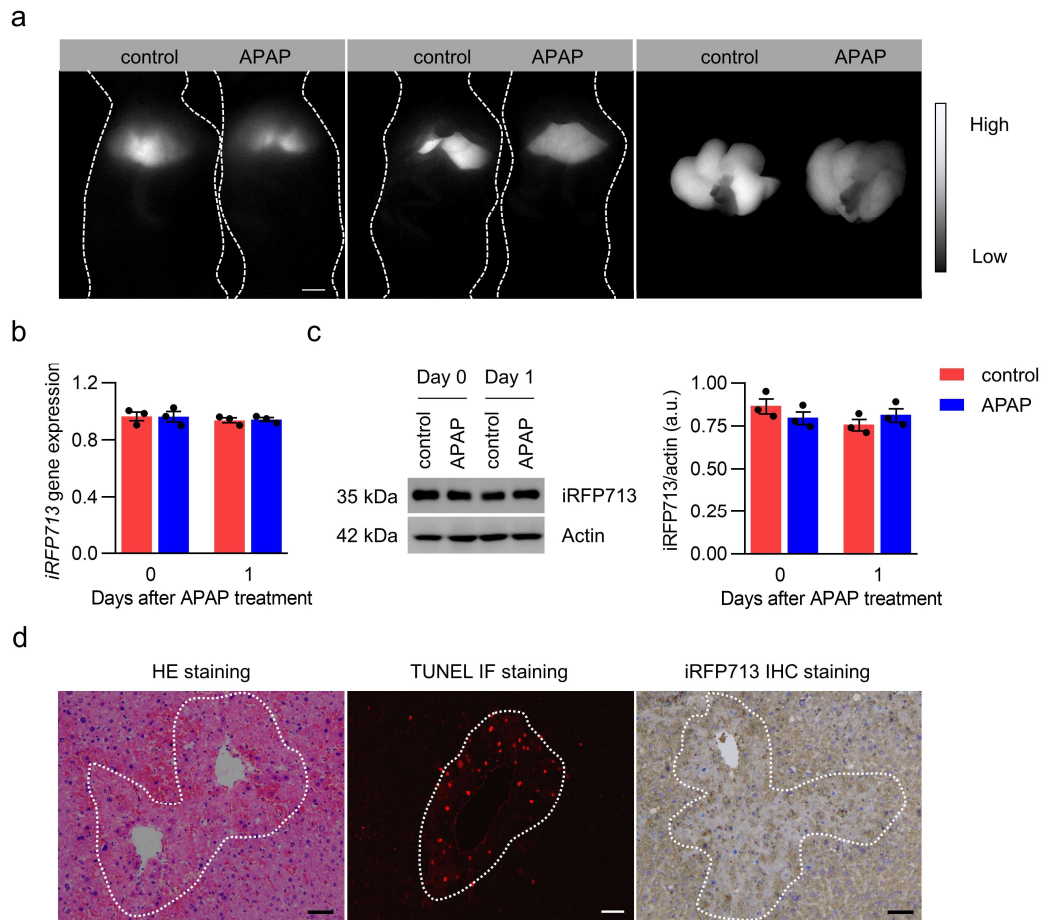

(a) Representative fluorescence images of iRFP713<sup>flx/flx</sup>; Alb-Cre mice treated or not APAP. One day after APAP treatment, liver *in vivo* (**left**), liver with laparotomy (**middle**) and isolated liver (**right**) were imaged using 690 nm excitation and 900 nm LP filters. Exposure times: 10 ms (**a, left**), 50 ms (**a, middle**) and 20 ms (**a, right**). (b) iRFP713 gene expression level and (c) protein level in liver of iRFP713<sup>flx/flx</sup>; Alb-Cre mice at day 0 and day 1 after treated or not APAP. Intensities of iRFP713 protein bands were quantified and normalized to actin (**c, right**). Data presented as mean  $\pm$  SEM; n = 3 mice for each group. (d) Representative HE staining (**left**), TUNEL fluorescence staining (**middle**) and IHC staining of iRFP713 (**right**) in liver sections from iRFP713<sup>flx/flx</sup>; Alb-Cre mice after 1 day of APAP treatment. These staining experiments were repeated independently three times with similar results. Scale bar: 5 mm (**a**), 20  $\mu$ m (**d: left, right**), and 5  $\mu$ m (**d: middle**). Source data are provided as a Source Data file.

**Supplementary Figure 13.** Characterization of multiple low-dose STZ induced diabetes.

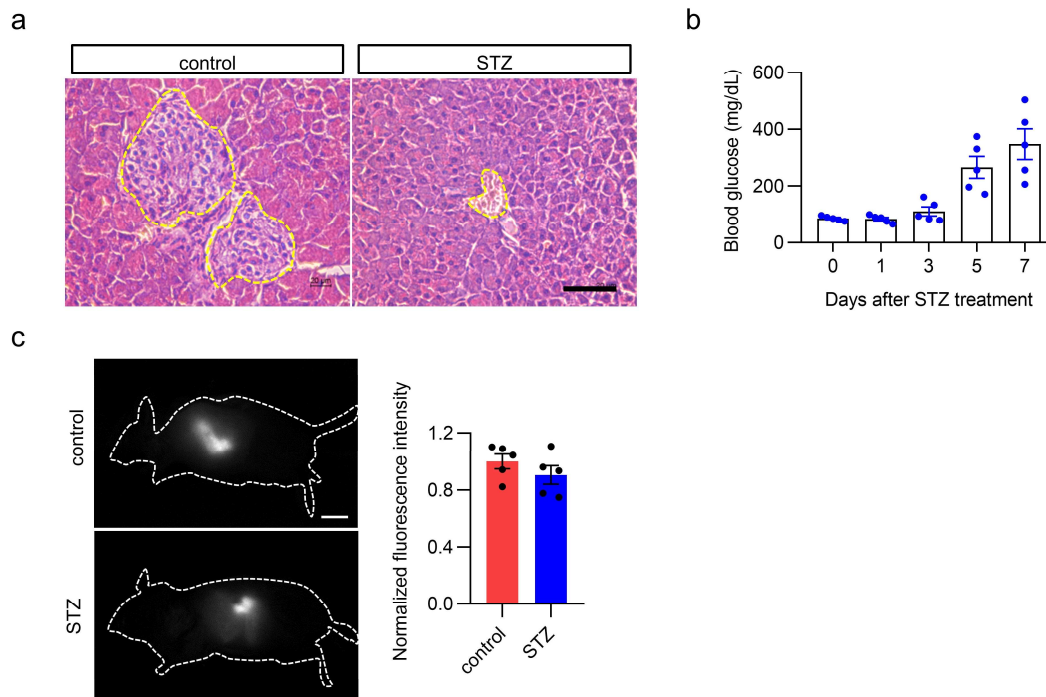

**(a)** Representative photographs of HE stained pancreas isolated from  $iRFP713^{flx/flx}$ ;  $Pdx1-Cre$  mice treated with control saline (0.9% NaCl) or multiple low dose STZ (50 mg/kg/day, 5 days). **(b)** Blood glucose records of  $iRFP713^{flx/flx}$ ;  $Pdx1-Cre$  mice at different times after STZ treatment. **(c)** Representative NIR-II fluorescence images of  $iRFP713^{flx/flx}$ ;  $Pdx1-Cre$  mice treated with control saline or STZ. Mean fluorescence intensity was provided. All data presented as mean  $\pm$  SEM;  $n = 5$  mice for each group. Images were acquired with 690 nm excitation and 900 nm LP filters. Exposure times: 15 ms. Scale bars: 20  $\mu$ m **(a)** and 5 mm **(c)**.

**Supplementary Figure 14.** Long-term expression stability of iRFP713 transgenic mice.

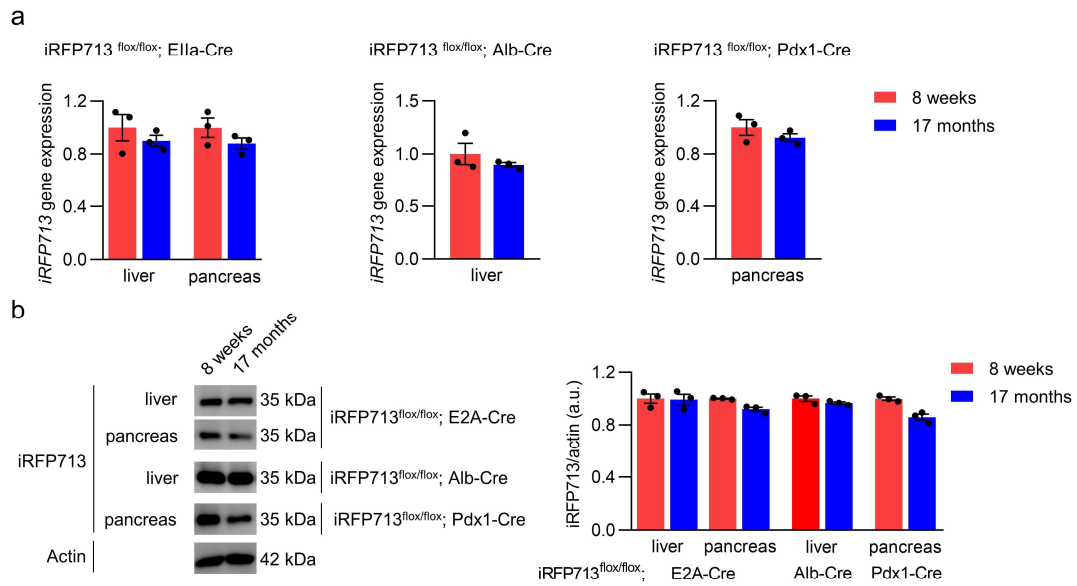

**(a)** Gene expression levels and **(b)** protein levels of iRFP713 in liver or pancreas of different iRFP713 transgenic mice (iRFP713<sup>flox/flox</sup>; EIIa-Cre, iRFP713<sup>flox/flox</sup>; Alb-Cre and iRFP713<sup>flox/flox</sup>; Pdx1-Cre) at weeks 8 and months 17. iRFP713 protein bands intensities were quantified and normalized to actin (**b, right**). Data presented as mean  $\pm$  SEM; n = 3 mice for each group. Source data are provided as a Source Data file.

**Supplementary Figure 15.** Comparison of iRFP713 imaging in NIR-I and NIR-II regions.

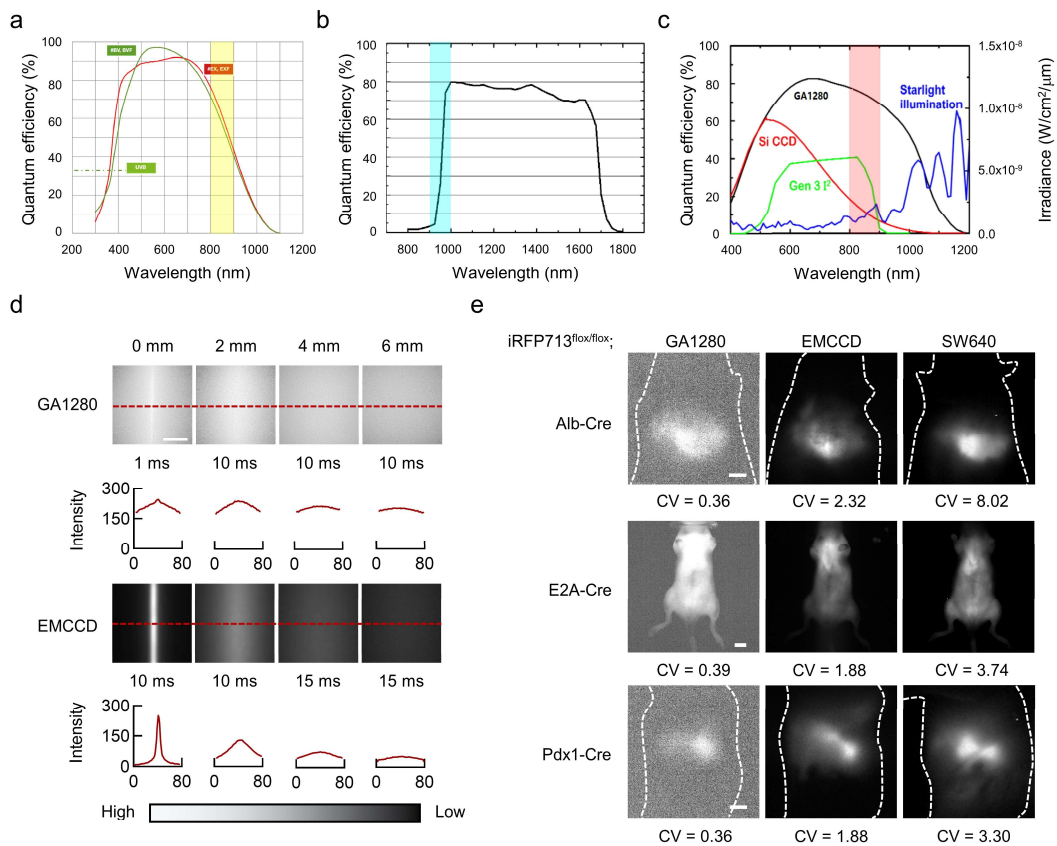

The quantum efficiency curve of **(a)** iXon Ultra 897 camera (EMCCD) and **(b)** SW640 camera (InGaAs FPA). The yellow area indicates the region of 800-900 nm and the blue area indicates the region of 900-1000 nm. **(c)** The quantum efficiency curve of GA1280 camera (vis-NIR 2D-detector, black line). The red area indicates the region of 800-900 nm. **(d)** NIR-I fluorescence (800-900 nm) images of a capillary tube containing iRFP713 immersed at various depths in 1% intralipid ( $1 \text{ mg mL}^{-1}$ , 690 nm Ex). Exposure times: (GA1280) 0 mm: 1 ms; 2 mm, 4 mm and 6 mm: 10 ms. (EMCCD) 0 mm and 2 mm: 10 ms; 4 mm and 6 mm: 15 ms. **(e)** The NIR-I fluorescence (800-900 nm) images using the GA1280 camera (**left**) and iXon Ultra 897 camera (**middle**) and the NIR-II fluorescence ( $>900 \text{ nm}$ ) images using the SW640 camera (**right**). (690 nm Ex and 800-900 nm/ $>900 \text{ nm}$  Em). Exposure times: (GA1280) Alb-Cre and Pdx1-Cre: 0.025 ms; E2A-Cre: 0.25 ms. (EMCCD) Alb-Cre, Pdx1-Cre and E2A-Cre: 1 ms. (SW640) Alb-Cre: 5 ms; E2A-Cre: 10 ms; Pdx1-Cre: 1 ms. Scale bars: 5 mm (**d, e**).

**Supplementary Table 1.** The calculated area SBR values.

| <b>Area SBR values</b>                  | <b>GA1280</b> | <b>iXon Ultra 897</b> | <b>SW640</b> |
|-----------------------------------------|---------------|-----------------------|--------------|
| iRFP713 <sup>flox/flox</sup> ; Alb-Cre  | 3.07          | 21.62                 | 213.99       |
| iRFP713 <sup>flox/flox</sup> ; E2A-Cre  | 2.33          | 13.32                 | 72.31        |
| iRFP713 <sup>flox/flox</sup> ; Pdx1-Cre | 2.95          | 17.83                 | 47.07        |

**Supplementary Table 2.** Primers of iRFP713.

| <b>Genotyping primers</b> |                           |
|---------------------------|---------------------------|
| <b>Primers</b>            | <b>Sequence (5'-3')</b>   |
| iRFP713-F                 | CACTTGCTCTCCCAAAGTCGCTC   |
| iRFP713-R1                | ATACTCCGAGGCGGATCACAA     |
| iRFP713-R2                | AGATGTACTGCCAAGTAGGAAAGTC |
| <b>RT-qPCR primers</b>    |                           |
| <b>Primers</b>            | <b>Sequence (5'-3')</b>   |
| iRFP713-qPCR-F1           | CACTCTTCCATCACGCCGAT      |
| iRFP713-qPCR-R1           | TGATCGTTTGCCATCACCGA      |

**Supplementary Table 3.** Antibodies used for experiments.

| <b>Antibody</b> | <b>Catalog Number</b> | <b>Company</b>            | <b>Dilution</b> |
|-----------------|-----------------------|---------------------------|-----------------|
| Cyclin D1       | 60186-1-Ig            | Proteintech               | 1:1000          |
| Ki-67           | 556003                | BD Biosciences            | 1:500           |
| Actin           | 4970                  | Cell signaling technology | 1:5000          |
| iRFP713         | Not available         | HuaAn Biotechnology       | 1:1000          |
