# Supplementary material for: Long-term monitoring of intravital biological processes using fluorescent protein-assisted NIR-II imaging
Source: PubMed Central journal article supplement (PMC9636246; doi:10.1038/s41467-022-34274-w), 2022-11-04
Supplement: 41467_2022_34274_MOESM5_ESM.pdf [file 41467_2022_34274_MOESM5_ESM.pdf]

**Title:** Supplementary movie 1.

**Description:** NIR-II fluorescence imaging of newborn whole-body iRFP713-expressing mice and control littermate mice.

**Title:** Supplementary movie 2.

**Description:** NIR-II fluorescence imaging of the pancreas-specific iRFP713- expressing mice after laparotomy.
